# Supplementary material for: Comparison Study of Myocardial Radiomics Feature Properties on Energy-Integrating and Photon-Counting Detector CT
Source: MDPI journal article supplement (doi:10.3390/diagnostics12051294), 2022-05-23
Supplement: s1 [file s1]

## Supplemental Material

**Supplemental Table S1.** Overview of all parameters

| Feature Mean (SD)                               | EICT                            | PCCT                            | <i>t</i> test | F test |
|-------------------------------------------------|---------------------------------|---------------------------------|---------------|--------|
| <i>n</i>                                        | 25                              | 25                              |               |        |
| First order Features                            |                                 |                                 |               |        |
| original_firstorder_10Percentile                | 71.21 (20.17)                   | 73.32 (14.39)                   | 0.673         | 0.105  |
| original_firstorder_90Percentile                | 179.70 (35.23)                  | 183.56 (26.71)                  | 0.664         | 0.183  |
| original_firstorder_Energy                      | 1353081205.22<br>(431837986.34) | 1564414365.82<br>(428476193.07) | 0.089         | 0.970  |
| original_firstorder_Entropy                     | 2.94 (0.28)                     | 2.96 (0.28)                     | 0.866         | 0.971  |
| original_firstorder_InterquartileRange          | 52.51 (10.58)                   | 54.91 (11.08)                   | 0.436         | 0.821  |
| original_firstorder_Kurtosis                    | 11.78 (5.02)                    | 12.12 (5.59)                    | 0.824         | 0.603  |
| original_firstorder_Maximum                     | 517.90 (120.68)                 | 604.00 (119.59)                 | 0.015         | 0.965  |
| original_firstorder_MeanAbsoluteDeviation       | 36.42 (7.35)                    | 37.13 (7.40)                    | 0.734         | 0.970  |
| original_firstorder_Mean                        | 125.40 (26.86)                  | 128.42 (17.99)                  | 0.642         | 0.055  |
| original_firstorder_Median                      | 124.93 (25.88)                  | 126.65 (17.04)                  | 0.782         | 0.046  |
| original_firstorder_Minimum                     | -371.27 (112.63)                | -326.57 (119.02)                | 0.179         | 0.789  |
| original_firstorder_Range                       | 889.18 (183.37)                 | 930.57 (173.77)                 | 0.417         | 0.795  |
| original_firstorder_RobustMeanAbsoluteDeviation | 22.14 (4.45)                    | 23.15 (4.72)                    | 0.441         | 0.770  |
| original_firstorder_RootMeanSquared             | 136.35 (28.12)                  | 139.42 (19.43)                  | 0.655         | 0.076  |
| original_firstorder_Skewness                    | -0.28 (0.97)                    | 0.28 (0.86)                     | 0.035         | 0.557  |
| original_firstorder_TotalEnergy                 | 1353081205.22<br>(431837986.34) | 1564414365.82<br>(428476193.07) | 0.089         | 0.970  |
| original_firstorder_Uniformity                  | 0.17 (0.03)                     | 0.17 (0.03)                     | 0.663         | 0.841  |
| original_firstorder_Variance                    | 2932.46 (1195.57)               | 2998.05 (1177.88)               | 0.846         | 0.942  |
| Gray Level Co-Occurrence Matrix (GLCM)          |                                 |                                 |               |        |
| original_glcm_Autocorrelation                   | 458.81 (219.23)                 | 389.94 (182.53)                 | 0.233         | 0.376  |
| original_glcm_ClusterProminence                 | 1948.87 (1356.41)               | 1960.21 (1495.19)               | 0.978         | 0.637  |
| original_glcm_ClusterShade                      | -2.40 (49.66)                   | 21.11 (40.77)                   | 0.074         | 0.340  |
| original_glcm_ClusterTendency                   | 12.91 (5.03)                    | 12.99 (5.08)                    | 0.957         | 0.963  |
| original_glcm_Contrast                          | 2.76 (1.00)                     | 3.43 (1.30)                     | 0.049         | 0.206  |
| original_glcm_Correlation                       | 0.64 (0.03)                     | 0.57 (0.07)                     | <0.001        | <0.001 |

|                                                    |                     |                     |       |        |
|----------------------------------------------------|---------------------|---------------------|-------|--------|
| original_glcm_DifferenceAverage                    | 1.14 (0.22)         | 1.28 (0.28)         | 0.057 | 0.233  |
| original_glcm_DifferenceEntropy                    | 1.94 (0.22)         | 2.05 (0.25)         | 0.112 | 0.463  |
| original_glcm_DifferenceVariance                   | 1.38 (0.50)         | 1.67 (0.62)         | 0.082 | 0.270  |
| original_glcm_Id                                   | 0.60 (0.04)         | 0.58 (0.06)         | 0.078 | 0.280  |
| original_glcm_Idm                                  | 0.57 (0.05)         | 0.53 (0.07)         | 0.074 | 0.267  |
| original_glcm_Idmn                                 | 1.00 (0.00)         | 1.00 (0.00)         | 0.115 | <0.001 |
| original_glcm_Idn                                  | 0.97 (0.00)         | 0.97 (0.01)         | 0.194 | <0.001 |
| original_glcm_Imc1                                 | -0.15 (0.02)        | -0.13 (0.04)        | 0.002 | 0.007  |
| original_glcm_Imc2                                 | 0.73 (0.04)         | 0.66 (0.08)         | 0.001 | <0.001 |
| original_glcm_InverseVariance                      | 0.46 (0.01)         | 0.45 (0.02)         | 0.016 | 0.062  |
| original_glcm_JointAverage                         | 20.92 (4.38)        | 19.14 (4.71)        | 0.171 | 0.725  |
| original_glcm_JointEnergy                          | 0.05 (0.02)         | 0.04 (0.02)         | 0.320 | 0.816  |
| original_glcm_JointEntropy                         | 5.24 (0.53)         | 5.39 (0.57)         | 0.363 | 0.672  |
| original_glcm_MCC                                  | 0.71 (0.04)         | 0.67 (0.07)         | 0.025 | 0.011  |
| original_glcm_MaximumProbability                   | 0.10 (0.03)         | 0.09 (0.04)         | 0.238 | 0.751  |
| original_glcm_SumAverage                           | 41.85 (8.76)        | 38.27 (9.42)        | 0.171 | 0.725  |
| original_glcm_SumEntropy                           | 3.68 (0.28)         | 3.68 (0.29)         | 0.980 | 0.877  |
| original_glcm_SumSquares                           | 3.92 (1.50)         | 4.10 (1.57)         | 0.671 | 0.827  |
| Gray Level Dependence Matrix (GLDM)                |                     |                     |       |        |
| original_gldm_DependenceEntropy                    | 6.72 (0.14)         | 6.66 (0.16)         | 0.163 | 0.598  |
| original_gldm_DependenceNonUniformity              | 5187.88 (1504.68)   | 6089.68 (1706.31)   | 0.053 | 0.543  |
| original_gldm_DependenceNonUniformityNormalized    | 0.07 (0.01)         | 0.08 (0.01)         | 0.074 | 0.042  |
| original_gldm_DependenceVariance                   | 17.60 (4.24)        | 15.70 (5.90)        | 0.197 | 0.112  |
| original_gldm_GrayLevelNonUniformity               | 13444.88 (5984.33)  | 14296.93 (5930.22)  | 0.615 | 0.965  |
| original_gldm_GrayLevelVariance                    | 4.77 (1.91)         | 4.88 (1.88)         | 0.846 | 0.945  |
| original_gldm_HighGrayLevelEmphases                | 460.63 (219.06)     | 392.29 (181.92)     | 0.236 | 0.369  |
| original_gldm_LargeDependenceEmphasis              | 82.29 (24.63)       | 74.29 (33.83)       | 0.344 | 0.127  |
| original_gldm_LargeDependenceHighGrayLevelEmphasis | 37458.58 (23387.03) | 33225.80 (32027.68) | 0.596 | 0.130  |

|                                                    |                    |                     |       |        |
|----------------------------------------------------|--------------------|---------------------|-------|--------|
| original_gldm_LargeDependenceLowGrayLevelEmphasis  | 0.22 (0.12)        | 0.23 (0.12)         | 0.723 | 0.907  |
| original_gldm_LowGrayLevelEmphasis                 | 0.00 (0.00)        | 0.00 (0.00)         | 0.074 | <0.001 |
| original_gldm_SmallDependenceEmphasis              | 0.07 (0.02)        | 0.08 (0.03)         | 0.140 | 0.297  |
| original_gldm_SmallDependenceHighGrayLevelEmphasis | 34.15 (17.62)      | 31.15 (12.39)       | 0.490 | 0.091  |
| original_gldm_SmallDependenceLowGrayLevelEmphasis  | 0.00 (0.00)        | 0.00 (0.00)         | 0.032 | <0.001 |
| Gray Level Run Length Matrix (GLRLM)               |                    |                     |       |        |
| original_glrlm_GrayLevelNonUniformity              | 8742.78 (3359.73)  | 9619.14 (3251.00)   | 0.353 | 0.873  |
| original_glrlm_GrayLevelNonUniformityNormalized    | 0.16 (0.03)        | 0.15 (0.03)         | 0.876 | 0.879  |
| original_glrlm_GrayLevelVariance                   | 5.73 (2.18)        | 5.75 (2.09)         | 0.979 | 0.848  |
| original_glrlm_HighGrayLevelRunEmphasis            | 461.80 (219.17)    | 393.66 (182.01)     | 0.238 | 0.369  |
| original_glrlm_LongRunEmphasis                     | 2.87 (0.60)        | 2.80 (0.93)         | 0.772 | 0.040  |
| original_glrlm_LongRunHighGrayLevelEmphasis        | 1320.16 (786.35)   | 1208.30 (994.76)    | 0.661 | 0.257  |
| original_glrlm_LongRunLowGrayLevelEmphasis         | 0.01 (0.00)        | 0.01 (0.01)         | 0.202 | 0.016  |
| original_glrlm_LowGrayLevelRunEmphasis             | 0.00 (0.00)        | 0.00 (0.00)         | 0.076 | <0.001 |
| original_glrlm_RunEntropy                          | 4.19 (0.13)        | 4.13 (0.15)         | 0.113 | 0.436  |
| original_glrlm_RunLengthNonUniformity              | 33063.86 (9100.95) | 38416.38 (10688.76) | 0.063 | 0.437  |
| original_glrlm_RunLengthNonUniformityNormalized    | 0.60 (0.06)        | 0.62 (0.07)         | 0.189 | 0.170  |
| original_glrlm_RunPercentage                       | 0.73 (0.05)        | 0.75 (0.06)         | 0.257 | 0.140  |
| original_glrlm_RunVariance                         | 0.82 (0.28)        | 0.79 (0.44)         | 0.802 | 0.033  |
| original_glrlm_ShortRunEmphasis                    | 0.80 (0.04)        | 0.81 (0.05)         | 0.272 | 0.175  |
| original_glrlm_ShortRunHighGrayLevelEmphasis       | 368.71 (170.44)    | 313.73 (127.68)     | 0.203 | 0.164  |
| original_glrlm_ShortRunLowGrayLevelEmphasis        | 0.00 (0.00)        | 0.00 (0.00)         | 0.062 | <0.001 |
| Gray Level Size Zone Matrix (GLSZM)                |                    |                     |       |        |
| original_glszm_GrayLevelNonUniformity              | 304.54 (69.82)     | 397.07 (160.54)     | 0.011 | <0.001 |

|                                                  |                             |                             |        |        |
|--------------------------------------------------|-----------------------------|-----------------------------|--------|--------|
| original_glszm_GrayLevelNonUniformityNormalized  | 0.07 (0.01)                 | 0.07 (0.01)                 | 0.618  | 0.724  |
| original_glszm_GrayLevelVariance                 | 23.71 (6.99)                | 22.84 (7.14)                | 0.665  | 0.922  |
| original_glszm_HighGrayLevelZoneEmphasis         | 493.02 (228.33)             | 429.22 (181.95)             | 0.280  | 0.273  |
| original_glszm_LargeAreaEmphasis                 | 225617.74 (197772.52)       | 237076.43 (263655.32)       | 0.863  | 0.166  |
| original_glszm_LargeAreaHighGrayLevelEmphasis    | 117066058.77 (185145181.54) | 121442209.86 (195707701.69) | 0.936  | 0.788  |
| original_glszm_LargeAreaLowGrayLevelEmphasis     | 566.44 (600.65)             | 619.16 (609.19)             | 0.759  | 0.945  |
| original_glszm_LowGrayLevelZoneEmphasis          | 0.00 (0.00)                 | 0.01 (0.00)                 | 0.111  | <0.001 |
| original_glszm_SizeZoneNonUniformity             | 1215.38 (435.47)            | 1622.80 (651.64)            | 0.012  | 0.054  |
| original_glszm_SizeZoneNonUniformityNormalized   | 0.27 (0.04)                 | 0.29 (0.03)                 | 0.023  | 0.662  |
| original_glszm_SmallAreaEmphasis                 | 0.53 (0.04)                 | 0.56 (0.03)                 | 0.028  | 0.488  |
| original_glszm_SmallAreaHighGrayLevelEmphasis    | 269.49 (131.57)             | 243.84 (100.07)             | 0.442  | 0.187  |
| original_glszm_SmallAreaLowGrayLevelEmphasis     | 0.00 (0.00)                 | 0.00 (0.00)                 | 0.068  | <0.001 |
| original_glszm_ZoneEntropy                       | 6.82 (0.11)                 | 6.66 (0.17)                 | <0.001 | 0.054  |
| original_glszm_ZonePercentage                    | 0.06 (0.02)                 | 0.07 (0.03)                 | 0.229  | 0.359  |
| original_glszm_ZoneVariance                      | 225224.24 (197482.13)       | 236696.23 (263197.67)       | 0.862  | 0.167  |
| Neighbouring Grey Tone Difference Matrix (NGTDM) |                             |                             |        |        |
| original_ngtdm_Busyness                          | 6.54 (2.31)                 | 9.96 (7.85)                 | 0.042  | <0.001 |
| original_ngtdm_Coarseness                        | 0.00 (0.00)                 | 0.00 (0.00)                 | 0.011  | 0.178  |
| original_ngtdm_Complexity                        | 514.03 (251.11)             | 598.01 (200.18)             | 0.197  | 0.274  |
| original_ngtdm_Contrast                          | 0.01 (0.00)                 | 0.01 (0.00)                 | 0.153  | 0.013  |
| original_ngtdm_Strength                          | 0.16 (0.06)                 | 0.15 (0.08)                 | 0.462  | 0.403  |

**Supplemental Information:** pyradiomics settings. Extraction parameters{'minimumROIDimensions': 2, 'minimumROISize': None, 'normalize': False, 'normalizeScale': 1, 'removeOutliers': None, 'resampledPixelSpacing': None, 'interpolator': 'sitkBSpline', 'preCrop': False, 'padDistance': 5, 'distances': [1], 'force2D': False, 'force2Ddimension': 0, 'resegmentRange': None, 'label': 1, 'additionalInfo': True} Enabled filters: {'Original': {}} Enabled features: {'firstorder': [], 'glcm': [], 'gldm': [], 'glrlm': [], 'glszm': [], 'ngtdm': []}
